# Supplementary material for: Strategy for absolute quantification of proteins: CH3Hg+ labeling integrated molecular and elemental mass spectrometry
Source: Royal Society of Chemistry journal article supplement (doi:10.1039/b902241d), 2009-01-01
Supplement: b902241d.pdf [file b902241d.pdf]

## Electronic Supplementary Information

# Strategy for absolute quantification of proteins: $\text{CH}_3\text{Hg}^+$ labeling integrated molecular and elemental mass spectrometry

Yifei Guo,<sup>a</sup> Ming Xu,<sup>a</sup> Limin Yang<sup>a</sup> and Qiuquan Wang<sup>\*a,b</sup>

<sup>a</sup> Department of Chemistry & the MOE Key Laboratory of Modern Analytical Sciences, College of Chemistry and Chemical Engineering, Xiamen University, Xiamen 361005, China. Fax: +86 592 2187400; Tel: +86 592 2181796; E-mail: qqwang@xmu.edu.cn

<sup>b</sup> State Key Laboratory of Marine Environmental Science, Xiamen University, Xiamen 361005, China

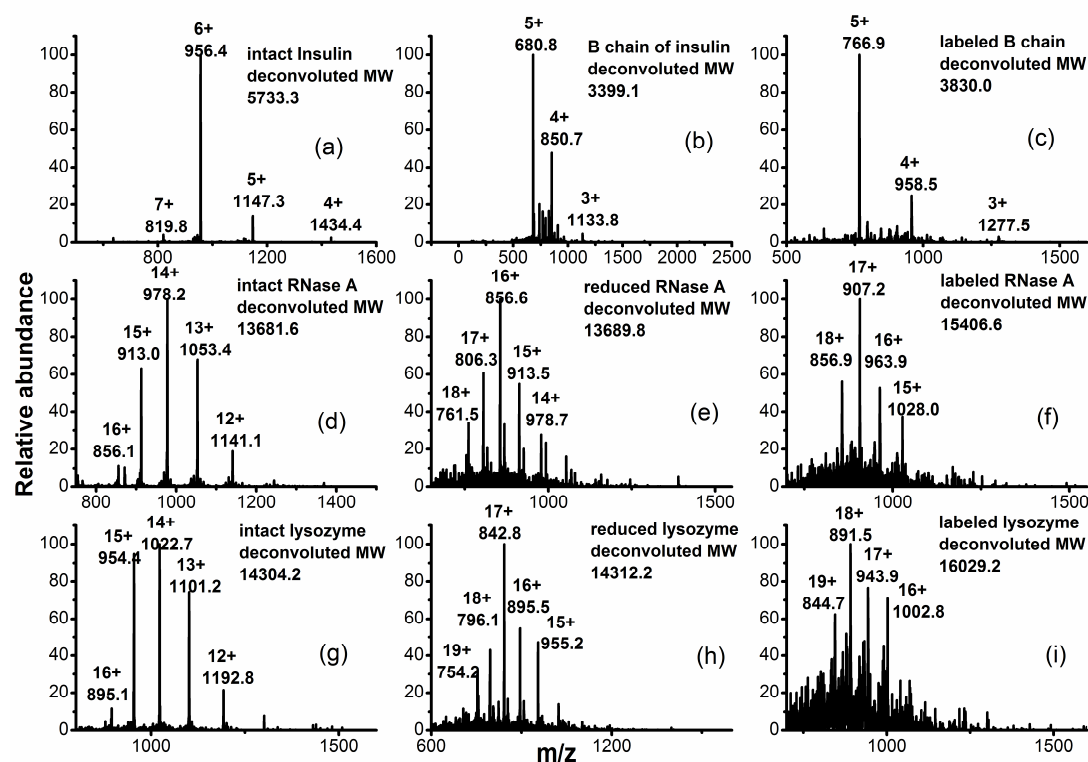

**Figure S1** ESI-MS spectra for confirming the binding stoichiometry of the labeled proteins. (a), (d), and (g) are the mass spectra of intact insulin, RNase A, and lysozyme, respectively; (b), (e), and (h) represent those of the reduced proteins by TCEP; (c), (f), and (i) are those of the labeled proteins.

All MS experiments were performed in the positive ion mode. The operational parameters were as follows: nebulizer, 22 psi; dry gas, 12 L/min; dry temperature, 300 °C; capillary, -3500 V; end plate offset, -500 V; skim 1, 35.0 V; skim 2, 6.0 V; capillary exit offset, 60.0 V; octopole, 2.80 V; lens 1, -5.0V; lens 2, -60.0 V; trap drive, 55.0; and max accumulation time, 50 ms.

Although the binding stoichiometry of the labeled protein formed between

$\text{CH}_3\text{Hg}^+$  and -SH theoretically reach 1:1 when all -SHs are exposed, it is necessary to confirm it by MMS for an accurate quantification. Our experiment results showed that the realistic performance of  $\text{CH}_3\text{Hg}^+$  was consistent with theory quite well. Given excessive  $\text{CH}_3\text{Hg}^+$ , all of -SHs (including reduced from -S-S-) could completely react with  $\text{CH}_3\text{Hg}^+$  due to the high affinity and the specificity of S-Hg reaction. The ESI-MS results of some typical proteins chosen as models including insulin, RNase A, and lysozyme, which contain increasing various -S-S- linkages, are shown in Figure S1. Insulin is a 5.8 KDa dual-chain hormone which contains interchain disulfide bonds (ACys7-BCys7, ACys20-BCys19) and intrachain disulfide bond (ACys6-ACys11).<sup>1</sup> Figure S1a shows the mass spectrum of the intact insulin. Figure S1b is the mass spectrum of B chain of insulin containing two free -SHs after reduced by TCEP. The -SHs of B Chain were then labeled by  $\text{CH}_3\text{Hg}^+$ . The mass shift of 430.9 Da (that is just  $2 \times \text{CH}_3\text{Hg}^+$ ) could be clearly observed as shown in Figure S1c. RNase A is a 124-residue enzyme that contains four interweaving disulfide bridges (Cys26-Cys84, Cys40-Cys95, Cys58-Cys110, Cys65-Cys72) (Figure S1d).<sup>2</sup> Figure S1e shows the mass shift of 8.2 Da, indicating that the four -S-S- of RNase A were completely reduced to eight -SHs. The mass shift ( $8 \times \text{CH}_3\text{Hg}^+$ ) (Figure S1f) indicated that all of -SHs exist in the reduced RNase A were completely labeled by  $\text{CH}_3\text{Hg}^+$ . Lysozyme contains 8 cysteines, giving rise to four -S-S- (Cys6-Cys127, Cys30-Cys115, Cys64-Cys80, and Cys76-Cys94).<sup>3</sup> The mass spectrum of intact lysozyme is shown in Figure S1g. Figure S1h and Figure S1i show the mass spectrum of reduced and labeled lysozyme, respectively. The mass shift ( $8 \times \text{CH}_3\text{Hg}^+$ ) confirmed that the 8 free -SHs in the reduced lysozyme were all labeled. Since the ionizability of labeled proteins decreases with increasing  $\text{CH}_3\text{Hg}^+$  content, the mass spectra of labeled protein look much noisier than the original ones of the unlabeled protein. However, it can still serve for the determination of the binding stoichiometry.

## References

- 1 J. Brange, G. G. Dodson, D. J. Edwards, P. H. Holden and J. L. Whittingham, *Proteins Struct. Funct. Genet.*, 1997, **27**, 507–516.
- 2 T. A. Klink, K. J. Woycechowsky, K. M. Taylor and R. T. Raines, *Eur. J. Biochem.*, 2000, **267**, 566-572.
- 3 C. C. Blake, D. F. Koenig, G. A. Mair, A. C. North, D. C. Phillips and V. R. Sarma, *Nature*, 1965, **206**, 757-761.
